1 **Finding Nemo's Genes: A chromosome-scale reference assembly of the genome of the**  
2 **orange clownfish *Amphiprion percula***

3  
4 Robert Lehmann<sup>1</sup>, Damien J. Lightfoot<sup>1</sup>, Celia Schunter<sup>1</sup>, Craig T. Michell<sup>2</sup>, Hajime  
5 Ohyanagi<sup>3</sup>, Katsuhiko Mineta<sup>3</sup>, Sylvain Foret<sup>4,5</sup>, Michael L. Berumen<sup>2</sup>, David J. Miller<sup>4</sup>,  
6 Manuel Aranda<sup>2</sup>, Takashi Gojobori<sup>3</sup>, Philip L. Munday<sup>4</sup> and Timothy Ravasi<sup>1,\*</sup>

7  
8 <sup>1</sup> KAUST Environmental Epigenetic Program, Division of Biological and Environmental  
9 Sciences & Engineering, King Abdullah University of Science and Technology, Thuwal,  
10 23955-6900, Kingdom of Saudi Arabia.

11 <sup>2</sup> Red Sea Research Center, Division of Biological and Environmental Sciences &  
12 Engineering, King Abdullah University of Science and Technology, Thuwal, 23955-6900,  
13 Kingdom of Saudi Arabia.

14 <sup>3</sup> Computational Bioscience Research Center, King Abdullah University of Science and  
15 Technology, Thuwal, 23955-6900, Kingdom of Saudi Arabia.

16 <sup>4</sup> ARC Centre of Excellence for Coral Reef Studies, James Cook University, Townsville,  
17 Queensland, 4811, Australia.

18 <sup>5</sup> Evolution, Ecology and Genetics, Research School of Biology, Australian  
19 National University, Canberra, Australian Capital Territory, 2601, Australia.

20  
21 **Keywords:**

22 Orange Clownfish, *Amphiprion percula*, Nemo, Functional Genomics, Chromosome-Scale  
23 Assembly, Fish Genomics, Coral Reef Fish.

24  
25 **Running Title:**

26 The Nemo Genome

27  
28 **\*Corresponding Author:**

29 Timothy Ravasi, Division of Biological and Environmental Sciences & Engineering, King  
30 Abdullah University of Science and Technology, Thuwal, 23955-6900, Kingdom of Saudi  
31 Arabia, [timothy.ravasi@kaust.edu.sa](mailto:timothy.ravasi@kaust.edu.sa)

33 **Abstract**

34 The iconic orange clownfish, *Amphiprion percula*, is a model organism for studying the  
35 ecology and evolution of reef fishes, including patterns of population connectivity, sex  
36 change, social organization, habitat selection and adaptation to climate change. Notably, the  
37 orange clownfish is the only reef fish for which a complete larval dispersal kernel has been  
38 established and was the first fish species for which it was demonstrated that anti-predator  
39 responses of reef fishes could be impaired by ocean acidification. Despite its importance,  
40 molecular resources for this species remain scarce and until now it lacked a reference genome  
41 assembly. Here we present a *de novo* chromosome-scale assembly of the genome of the  
42 orange clownfish *Amphiprion percula*. We utilized single-molecule real-time sequencing  
43 technology from Pacific Biosciences to produce an initial polished assembly comprised of  
44 1,414 contigs, with a contig N50 length of 1.86 Mb. Using Hi-C based chromatin contact  
45 maps, 98% of the genome assembly were placed into 24 chromosomes, resulting in a final  
46 assembly of 908.8 Mb in length with contig and scaffold N50s of 3.12 and 38.4 Mb,  
47 respectively. This makes it one of the most contiguous and complete fish genome assemblies  
48 currently available. The genome was annotated with 26,597 protein coding genes and contains  
49 96% of the core set of conserved actinopterygian orthologs. The availability of this reference  
50 genome assembly as a community resource will further strengthen the role of the orange  
51 clownfish as a model species for research on the ecology and evolution of reef fishes.

52

53

## 54 **Introduction**

55 The orange clownfish, *Amphiprion percula*, which was immortalized in the film “Finding  
56 Nemo”, is arguably the most recognized fish on Earth. It is also one of the most important  
57 species for studying the ecology and evolution of coral reef fishes. The orange clownfish is  
58 used as a model species to study patterns and processes of social organization (Buston,  
59 Bogdanowicz, Wong, & Harrison, 2007; Buston & Wong, 2014; Wong, Uppaluri, Medina,  
60 Seymour, & Buston, 2016), sex change (Buston, 2003), mutualism (Schmiege, D’Aloia, &  
61 Buston, 2017), habitat selection (Dixson et al., 2008; Elliott & Mariscal, 2001; Scott &  
62 Dixson, 2016), lifespan (Buston & García, 2007) and predator-prey interactions (Dixson,  
63 2012; Manassa, Dixson, McCormick, & Chivers, 2013). It has been central to ground-  
64 breaking research into the scale of larval dispersal and population connectivity in marine  
65 fishes (Almany et al., 2017; Pinsky et al., 2017; Planes, Jones, & Thorrold, 2009; Salles et al.,  
66 2016) and how this influences the efficacy of marine protected areas (Berumen et al., 2012;  
67 Planes et al., 2009). It is also used to study the ecological effects of environmental  
68 disturbances in marine ecosystems (Hess, Wenger, Ainsworth, & Rummer, 2015; Wenger et  
69 al., 2014), including climate change (McLeod et al., 2013; Saenz-Agudelo, Jones, Thorrold, &  
70 Planes, 2011) and ocean acidification (Dixson, Munday, & Jones, 2010; Jarrold, Humphrey,  
71 McCormick, & Munday, 2017; Munday et al., 2009; Simpson et al., 2011). Perhaps more than  
72 any other species, the orange clownfish has become a mainstay of research into the chemical,  
73 molecular, behavioral, population, conservation and climate-change ecology of marine fishes.

74

75 The orange clownfish is one of 30 species of anemonefishes belonging to the subfamily  
76 Amphiprioninae within the family Pomacentridae (damsel-fishes). The two clownfishes, *A.*  
77 *percula* (orange clownfish or clown anemonefish) and *A. ocellaris* (false clownfish or western

78 clown anemonefish) form a separate clade, alongside *Premnas biaculeatus*, within the  
79 Amphiprioninae (J. Li, Chen, Kang, & Liu, 2015; Litsios, Pearman, Lanterbecq, Tolou, &  
80 Salamin, 2014; Litsios & Salamin, 2014). The two species of clownfish are easily  
81 distinguished from other anemonefishes by their bright orange body coloration and three  
82 vertical white bars. The orange clownfish and the false clownfish have similar body  
83 coloration, but largely distinct allopatric geographical distributions (Litsios & Salamin, 2014).  
84 The orange clownfish occurs in northern Australia, including the Great Barrier Reef (GBR),  
85 and in Papua New Guinea, Solomon Islands and Vanuatu, while the false clownfish occurs in  
86 the Indo-Malaysian region, from the Ryukyu Islands of Japan, throughout south-east Asia and  
87 south to north-western Australia (but not the GBR).

88

89 Like all anemonefishes, the orange clownfish has a mutualistic relationship with sea-  
90 anemones. Wild adults and juveniles live exclusively in association with a sea anemone,  
91 where they gain shelter from predators and benefit from food captured by the anemone  
92 (Fautin, 1991; Fautin & Allen, 1997; Mebs, 2009). In return, the sea-anemone benefits by  
93 gaining protection from predators (Fautin & Allen, 1997; Holbrook & Schmitt, 2005), from  
94 supplemental nutrition from the clownfish's waste (Holbrook & Schmitt, 2005) and from  
95 increased gas exchange as a result of increased water flow provided by clownfish movement  
96 and activity (Herbert, Bröhl, Springer, & Kunzmann, 2017; Szczebak, Henry, Al-Horani, &  
97 Chadwick, 2013). The orange clownfish associates with two species of anemone,  
98 *Stichodactyla gigantea* and *Heteractis magnifica* (Fautin & Allen, 1997). Clownfish social  
99 groups typically consist of an adult breeding pair and a variable number of smaller, size-  
100 ranked juveniles that queue for breeding rights (Buston, 2003). The breeding female is larger  
101 than the male. If the female disappears, the male changes sex to female and the largest non-

102 breeder matures into a breeding male. The breeding pair lays clutches of demersal eggs in  
103 close proximity to their host anemone. Eggs hatch after 7-8 days and the larvae disperse into  
104 the open ocean for a period of 11-12 days, at which time they return to the reef and settle to  
105 an anemone.

106

107 The close association of clownfish and other anemonefishes with sea anemones makes them  
108 excellent species for studying aspects of marine mutualisms and habitat selection. The easily  
109 identified and delineated habitat they occupy, along with the ease with which the fish can be  
110 observed in nature, makes them ideal candidates for behavioral and population ecology. The  
111 unique capacity to collect juveniles immediately after they have settled to the reef from their  
112 pelagic larval phase also makes them ideally suited to testing long-standing questions about  
113 larval dispersal and population connectivity in reef fish populations. Using molecular  
114 techniques to assign parentage between newly settled juveniles and adult anemonefishes,  
115 recent studies have been able to describe for the first time the spatial scales of dispersal in reef  
116 fish and its temporal consistency (Almany et al., 2017). The ability to map the connectivity of  
117 clownfish populations in space and time has also opened the door to addressing challenging  
118 questions about selection, fitness and adaptation in natural populations of marine fishes  
119 (Pinsky et al., 2017; Salles et al., 2016). Finally, the orange clownfish is one of the relatively  
120 few coral reef fishes that can easily be reared in captivity (Wittenrich, Turingan, & Creswell,  
121 2007). Consequently, it has unrivalled potential for experimental manipulation to test  
122 ecological and evolutionary questions in marine ecology (Dixon et al., 2014; Manassa et al.,  
123 2013), including the impacts of climate change and ocean acidification (Nilsson et al., 2012).  
124 Increasingly, genome-wide methods are being used to test ecological and evolutionary

125 questions and this is particularly true for coral reef species in the wake of anthropomorphic  
126 climate change and its effects on these sensitive ecosystems (Stillman & Armstrong, 2015)

127

128 To date, genome assemblies of two anemonefish, *A. frenatus* (Marcionetti, Rossier, Bertrand,  
129 Litsios, & Salamin, 2018) and *A. ocellaris* (Marcionetti et al., 2018), have been published.

130 Both of these were based on short-read Illumina technology with genome scaffolding  
131 provided by shallow coverage of PacBio (Marcionetti et al., 2018) or Oxford Nanopore (Tan

132 et al., 2018) long reads. While the use of long reads to scaffold Illumina-based assemblies

133 improves contiguity, both genome assemblies are highly fragmented with respective contig

134 and scaffold N50s of 14.9 and 244.5 kb for *A. frenatus* and 323.6 and 401.7 kb for *A.*

135 *ocellaris*. Here we present a chromosome-scale genome assembly of the orange clownfish,

136 which was assembled using a primary PacBio long read strategy, followed by scaffolding

137 with Hi-C-based chromatin contact maps. The resulting final assembly is highly contiguous

138 with contig and scaffold N50 values of 3.12 and 38.4 Mb, respectively. This assembly will be

139 a valuable resource for the research community and will further establish the orange

140 clownfish as a model organism for genetic and genomic studies into ecological, evolutionary

141 and environmental aspects of reef fishes. To facilitate the use of this resource, we have

142 developed an integrated database, the Nemo Genome DB (<http://nemogenome.org/>), which

143 allows for the interrogation and mining of genomic and transcriptomic data described here.

144

145

146

147

148 **Materials and Methods**

149 Specimen collection and DNA extraction

150 Adult orange clownfish breeding pairs were collected on the northern GBR in Australia. Fish  
151 were bred at the Experimental Aquarium Facility of James Cook University (JCU) and one  
152 individual offspring was sacrificed at the age of 8 months. The whole brain was excised, snap  
153 frozen and kept at -80°C until processing. High molecular weight DNA was extracted from  
154 whole brain tissue using the Qiagen Genomic-tip 100/G extraction kit. The tissue was first  
155 homogenized in lysis buffer G2 supplemented with 200 µg/mL RNase A using sterile beads  
156 for 30 sec. After homogenization, proteinase K was added and the homogenate was incubated  
157 at 50°C overnight. DNA extraction was then performed according to the manufacturer's  
158 protocol with a final elution volume of 200 µl. DNA fragment size and quality was assessed  
159 using pulsed-field gel electrophoresis. This study was completed under JCU animal ethics  
160 permits A1961 and A2255.

161

162 PacBio library preparation and sequencing

163 For Pacific Biosciences (PacBio) long read sequencing, the extracted orange clownfish DNA  
164 was first sheared using a g-TUBE (Covaris, MA, USA) (target size of 20 kb) and then  
165 converted into SMRTbell template libraries according to the manufacturer's protocol (Pacific  
166 Biosciences, CA, USA). Size selection was performed using BluePippin (Sage Science, MA,  
167 USA) to generate two libraries with a minimum size of 10 and 15 kb, respectively.  
168 Sequencing was performed using P6-C4 chemistry on the PacBio RS II instrument at the King  
169 Abdullah University of Science and Technology (KAUST) Bioscience Core Laboratory  
170 (BCL) with 360 mins movies. A total of 113 SMRT cells were sequenced.

171

172 Genome assembly

173 The genome sequence was assembled from the unprocessed PacBio reads (Table S1) using  
174 the hierarchical diploid aware PacBio assembler FALCON v0.4.0 (Chin et al., 2016). To  
175 obtain the optimal assembly, different parameters were tested (Table S2) to generate 12  
176 candidate assemblies. The contiguity of these assemblies was assessed with QUAST v3.2  
177 (Gurevich, Saveliev, Vyahhi, & Tesler, 2013), while assembly completeness was determined  
178 with BUSCO v2.0 (Simão, Waterhouse, Ioannidis, Kriventseva, & Zdobnov, 2015).  
179 Assembly “A7” exhibits the highest contiguity and single copy orthologous gene  
180 completeness and was selected for further improvement. The FALCON\_Unzip algorithm was  
181 then applied to the initial A7 assembly obtain a haplotype-resolved, phased assembly, termed  
182 “A7-phased”. Contigs less than 20 kb in length were removed from the assembly. This phased  
183 assembly was polished with Quiver to achieve final consensus sequence accuracies  
184 comparable to Sanger sequencing (Chin et al., 2013) using default settings, which produced  
185 the “A7-phased-polished” assembly.

186

#### 187 Genome assembly scaffolding with chromatin contact maps

188 The flash-frozen brain tissue was sent to Phase Genomics (Seattle, WA, USA) for the  
189 construction chromatin contact maps. Tissue fixation, chromatin isolation, library preparation  
190 and 80-bp paired end sequencing were performed by Phase Genomics. The sequencing reads  
191 were aligned to the A7-phased-polished version of the assembly with BWA (H. Li & Durbin,  
192 2010) and uniquely mapping read pairs were retained. Contigs from the A7-phased-polished  
193 assembly were clustered, ordered and then oriented using Proximo (Bickhart et al., 2017;  
194 Burton et al., 2013), with settings as previously described (Peichel, Sullivan, Liachko, &  
195 White, 2017). Briefly, contigs were clustered into chromosomal groups using a hierarchical  
196 clustering algorithm based on the number of read pairs linking scaffolds, with the final



197 number of groups specified as the number of the haploid chromosomes. The haploid  
198 chromosome number was set as 24, which is consistent with the observed haploid  
199 chromosome number of the Amphiprioninae, as published for *A. ocellaris* (Arai, Inoue, & Ida,  
200 1976), *A. frenatus*, (Molina & Galetti, 2004; Takai & Kosuga, 2007), *A. clarkii* (Arai &  
201 Inoue, 1976; Takai & Kosuga, 2007), *A. perideraion* (Supiwong et al., 2015) and *A. polymnus*  
202 (Tanomtong et al., 2012). After clustering into chromosomal groups, the scaffolds were  
203 ordered based on Hi-C link densities and then oriented with respect to the adjacent scaffolds  
204 using a weighted directed acyclic graph of all possible orientations based on the exact  
205 locations of the Hi-C links between scaffolds. Gaps between contigs were represented with  
206 100 Ns and the proximity-guided assembly was named “A7-PGA”. Gaps in the scaffolded  
207 assembly were subsequently closed using PBJelly from PBSuite v15.8.24 (English et al.,  
208 2012) with the entire PacBio read dataset and Blasr (Chaisson & Tesler, 2012) (parameters: --  
209 minMatch 8 --minPctIdentity 70 --bestn 1 --nCandidates 20 --maxScore -500 --nproc 32 --  
210 noSplitSubreads), to give rise to the final version of the assembly, “Nemo v1”.

211

### 212 Genome assembly validation

213 Genomic DNA was extracted from a second individual and Illumina sequencing libraries  
214 were prepared using the NEBNext Ultra II DNA library prep kit for Illumina following the  
215 manufacturer’s protocol. Three cycles of PCR were used to enrich the library. The sequencing  
216 libraries were sequenced on two lanes of a HiSeq 2500 at the KAUST BCL. A total of  
217 1,199,533,204 paired reads were generated, covering approximately 181 Gb. The 151-bp  
218 paired end reads were processed with Trimmomatic v0.33 to remove adapter sequences and  
219 low-quality stretches of nucleotides (parameters: 2:30:10 LEADING:20 TRAILING:20  
220 SLIDINGWINDOW:4:20 MINLEN:75) (Bolger, Lohse, & Usadel, 2014).

221

222 The genome assembly size was validated by comparison to a k-mer based estimate of genome  
223 size. The first half of the paired-end reads of one sequencing lane (~ 25 Gb of data) was used  
224 for the k-mer estimate of genome size. Firstly, KmerGenie (Chikhi & Medvedev, 2014) was  
225 used to determine the optimal k-value for a k-mer based estimation. Following that, Jellyfish  
226 v2.2.6 (Marçais & Kingsford, 2011) was used with k=71 to obtain the frequency distribution  
227 of all k-mers with this length. The resulting distribution was analyzed with Genomescope  
228 (Vurture et al., 2017) to estimate genome size, repeat content and the level of heterozygosity.  
229 To further validate the assembly, we determined the proportion of trimmed Illumina short  
230 reads that mapped to the Nemo v1 assembly with BWA v0.7.10 (H. Li & Durbin, 2010) and  
231 SAMtools v1.1 (H. Li et al., 2009). Additionally, the completeness of the genome assembly  
232 annotation as determined by the conservation of a core set of genes was measured using  
233 BUSCO with default parameters.

234

### 235 Repeat annotation

236 A species-specific *de novo* repeat library was assembled by combining the results of three  
237 distinct repeat annotation methods. Firstly, RepeatModeler v1.08 (Smit & Hubley, 2008) was  
238 used to build an initial repeat library. Secondly, we used LtrHarvest (Ellinghaus, Kurtz, &  
239 Willhoeft, 2008) and LTRdigest (Steinbiss, Willhoeft, Gremme, & Kurtz, 2009), both  
240 accessed *via* genomertools 1.5.6 (Gremme, Steinbiss, & Kurtz, 2013), with the following  
241 parameters: -seed 76 -xdrop 7 -mat 2 -mis -2 -ins -3 -del -3 -mintsd 4 -maxtsd 20 -minlenltr  
242 100 -maxlenltr 6000 -maxdistltr 25000 -mindistltr 1500 -similar 90. The resulting hits were  
243 filtered with LTRdigest, accepting only sequences featuring a hit to one of the hidden markov  
244 models in the GyDB 2.0 database. Thirdly, TransposonPSI v08222010 (Haas, 2018) was used

245 to detect sequences with similarities to known families of transposon open reading frames. To  
246 remove duplicated sequences in the combined result from all three methods a clustering with  
247 USEARCH (Edgar, 2010) was performed requiring at least 90% sequence identity, and only  
248 cluster representatives were retained. The resulting representative sequences were classified  
249 by RepeatClassifier (part of RepeatModeler), Censor v4.2.29 (Jurka, Klonowski, Dagman, &  
250 Pelton, 1996) and Dfam v2.0 (Wheeler et al., 2012), and were then blasted against the  
251 Uniprot/Swissprot database (release 2017\_12) to obtain a unified classification. Furthermore,  
252 these three classification methods and the blast result was used to filter out spurious matches  
253 to protein-coding sequence. Specifically, putative repeat sequences were only retained when  
254 at least one classification method recognized the sequence as a repeat and the best match in  
255 Swissprot/Uniprot was not a protein-coding gene (default blastx settings). Furthermore,  
256 sequences were retained if two of the three identification methods classified the sequence as  
257 repeat, but the best blast hit was not a transposable element. This *de novo* library was  
258 combined with the thoroughly curated zebrafish repeat library provided by Repbase v22.05  
259 (Bao, Kojima, & Kohany, 2015) and this combined library was employed for repeat masking  
260 in the Nemo v1 assembly using RepeatMasker (Smit, Hubley, & Green, 2010).

261

#### 262 RNA extraction, library construction, sequencing and read processing

263 Tissues for RNA extraction were dissected from one eight-month old orange clownfish  
264 individual. RNA was extracted from skin, eye, muscle, gill, liver, kidney, gallbladder,  
265 stomach and fin tissues using the Qiagen AllPrep kit following manufacturer's instructions.  
266 Sequencing libraries were prepared using the TruSeq Stranded mRNA Library Preparation kit  
267 and 150 bp paired-end sequencing was performed on one lane of an Illumina HiSeq 4000  
268 machine in the KAUST BCL. The RNA-seq reads were trimmed with Trimmomatic v0.33

269 (Bolger et al., 2014) (parameters: 2:30:10 LEADING:3 TRAILING:3  
270 SLIDINGWINDOW:4:15 MINLEN:40) and contamination was removed with Kraken (Wood  
271 & Salzberg, 2014) by retaining only unclassified reads.

272

### 273 Genome assembly annotation

274 After mapping the RNA-seq data with STAR v2.5.2b (Dobin et al., 2013) to the final  
275 assembly, an *ab-initio* annotation with BRAKER1 v1.9 (Hoff, Lange, Lomsadze,  
276 Borodovsky, & Stanke, 2016) was performed. This initial annotation identified 49,881 genes.  
277 This annotation was then integrated with external evidence using the MAKER2 v2.31.8 (Holt  
278 & Yandell, 2011) gene annotation pipeline. First, the transcriptome of the orange clownfish  
279 was provided to MAKER2 as EST evidence in two forms, a *de novo* assembly of the  
280 preprocessed RNA-seq reads obtained with Trinity v2.4.0 (Grabherr et al., 2011), and a  
281 genome-guided assembly performed with the Hisat2 v2.1.0/Stringtie v1.3.3b workflow  
282 (Pertea, Kim, Pertea, Leek, & Salzberg, 2016). Second, we combined the proteomes of  
283 zebrafish (GCF\_000002035.6\_GRCz11), Nile tilapia (GCF\_001858045.1\_ASM185804v2)  
284 and bicolor damselfish (*Stegastes partitus*) (GCA\_000690725.1), together with the  
285 Uniprot/Swissprot database (release 2017\_12: 554,515 sequences) and the successfully  
286 detected BUSCO genes to generate a reference protein set for homology based gene  
287 prediction. In the initial MAKER2 run, the annotation edit distances (AED) were calculated  
288 for the BRAKER1-obtained annotation, and only gene annotations with an AED of less than  
289 0.1 and a corresponding protein length of greater than 50 amino acids were retained for  
290 subsequent training of the gene prediction program SNAP v2013.11.29 (Korf, 2004).  
291 Similarly, the AUGUSTUS v3.2.3 (Stanke et al., 2006) gene prediction program was trained  
292 on 1,850 gene annotations that possessed: an AED score of less than 0.01; an initial start

293 codon, a terminal stop codon and no in-frame stop codons; more than one exon; and no  
294 introns greater than 10 kb. The hidden markov gene model of GeneMark v4.32 (Ter-  
295 Hovhannisyan, Lomsadze, Chernoff, & Borodovsky, 2008) was trained by BRAKER1. The  
296 final annotation was then obtained in the second run of MAKER2 with the trained models for  
297 SNAP, GeneMark, and AUGUSTUS. InterProScan 5 was then used to obtain the Pfam  
298 protein domain annotations for all genes. The standard gene builds were then generated. The  
299 output was filtered to include all annotated genes with evidence (AED less than 1) or with a  
300 Pfam protein domain, as recommended (Campbell, Holt, Moore, & Yandell, 2014).

301

### 302 Functional annotation

303 The protein sequences produced from the genome assembly annotation were aligned to the  
304 UniProtKB/Swiss-Prot database (release 2017\_12) with blastp v2.2.29 (parameters: -outfmt 5  
305 -evalue 1e-3 -word\_size 3 -show\_gis -num\_alignments 20 -max\_hsps 20) and protein  
306 signatures were annotated with InterProScan 5. The results were then integrated with  
307 Blast2GO v4.1.9 (Gotz et al., 2008).

308

### 309 Genome assembly comparisons

310 For genome assembly comparisons, we compared the Nemo v1 genome assembly to the 26  
311 previously reported fish chromosome-scale genome assemblies (Table S3). Comparisons were  
312 made for genome assembly contiguity and completeness. Contig N50 values are reported for  
313 the scaffold-scale versions of each assembly and are taken from the indicated publication  
314 (Table S3), database description (Table S3) or were generated with the Perl  
315 assemblathon\_stats\_2.pl script (Bradnam et al., 2013). Genome assembly completeness was  
316 assessed by determining the proportion of the genome size that is contained within the

317 chromosome content of each assembly. It should be noted that this comparison is relative to  
318 the estimated genome size and not the published assembly size. The estimated genome size  
319 was taken as either the published estimated genome size in the relevant paper (Table S3), or  
320 from the Animal Genome Size Database (Gregory, 2018). Where possible, k-mer derived or  
321 flow cytometry-based estimates of genome size were used. Before calculation, we remove  
322 stretches of Ns from the genome assemblies as these are used to arbitrarily space scaffolds  
323 and do not contain actual genome information. However, this step was not possible for the  
324 Asian arowana, southern platyfish, yellowtail or croaker genomes as the chromosome-scale  
325 assemblies have not been made publicly available. Genome assembly completeness was  
326 determined with BUSCO (Simão et al., 2015) using the Actinopterygii set of 4,584 genes and  
327 the AUGUSTUS zebrafish gene model provided with the software.

328

### 329 Gene homology

330 To investigate the gene space of the orange clownfish genome assembly, we used  
331 OrthoFinder v1.1.4 (Emms & Kelly, 2015) to identify orthologous gene relationships between  
332 the orange clownfish and four related fish species. The following four fish species were  
333 utilized in addition to the orange clownfish: Asian seabass  
334 GCF\_001640805.1\_ASM164080v1 (45,223 sequences), Nile tilapia  
335 GCF\_001858045.1\_ASM185804v2 (58,087 sequences), southern platyfish  
336 GCF\_000241075.1\_*Xiphophorus\_maculatus*-4.4.2 (23,478 sequences), and zebrafish  
337 GCF\_000002035.6\_GRCz11 (52,829 sequences). The longest isoform of each gene was  
338 utilized in the analysis, which corresponded to 25,050, 28,497, 23,043, and 32,420 sequences,  
339 respectively. 26,597 sequences were used for the orange clownfish. These protein sequences  
340 were reciprocally blasted against each other and clusters of orthologous genes were then

341 defined using OrthoFinder with default parameters. As part of OrthoFinder, the concatenated  
342 sequences of single-copy orthologs present in all species were then used to construct a  
343 phylogenetic tree, which was rooted using STRIDE (Emms & Kelly, 2017).

344

#### 345 Database system architecture and software

346 The Nemo Genome DB database (<http://nemogenome.org>) was implemented on a UNIX  
347 server with CentOS version 7, Apache web server and MySQL Database server. JBrowse  
348 (Buels et al., 2016) was employed to visualize the genome assembly and genomic features  
349 graphically and interactively. JavaScript was adopted to implement client-side rich  
350 applications. The JavaScript library, jQuery (<http://jquery.com>) was employed. Other  
351 conventional utilities for UNIX computing were appropriately installed on the server if  
352 necessary. All of the Nemo Genome DB resources are stored on the server and are available  
353 through HTTP access.

354

355

## 356 **Results and Discussion**

### 357 Sequencing and assembly of the orange clownfish genome

358 Genomic DNA of an individual orange clownfish (Fig. 1A) was sequenced with the PacBio  
359 RS II platform to generate 1,995,360 long reads, yielding 113.8 Gb, which corresponds to a  
360 121-fold coverage of the genome (Table S1). After filtering with the read pre-assembly step  
361 of the Falcon assembler, 5,764,748 reads, covering 54.3 Gb and representing a 58-fold  
362 coverage of the genome, were available for assembly.

363

364 To optimize the assembly parameters, we performed 12 trial assemblies using a range of  
365 parameters for different stages of the Falcon assembler (Table S2). The assembly quality was  
366 assessed by considering assembly contiguity (contig N50 and L50), total assembly size, and  
367 also gene completeness (BUSCO) (Table 1). Assembly A7 exhibited the highest contig N50  
368 (1.80 Mb), lowest contig L50 (138 contigs), lowest number of missing BUSCO genes (132)  
369 and is only slightly surpassed in the longest contig metric (15.8 Mb) by the highly similar  
370 assemblies A8 and A9 (16.5 Mb) (Table 1).

371  
372 Genome assemblies represent a mixture of the two possible haplotypes of a diploid individual  
373 at each locus. This collapsing of haplotypes may result in a loss of important sequence  
374 information. However, diploid-aware assembly algorithms such as the Falcon\_Unzip  
375 assembler are designed to detect single nucleotide polymorphisms (SNPs) as well as structural  
376 variations and to use this information to phase (“unzip”) heterozygous regions into distinct  
377 haplotypes (Chin et al., 2016). This procedure results in a primary assembly and a set of  
378 associated haplotype contigs (haplotigs) capturing the divergent sequences. Having  
379 established the parameter set that gave the best assembly metrics with Falcon, we used  
380 Falcon\_Unzip to produce a phased assembly (“A7-phased”) of the orange clownfish (Table  
381 2). The phased assembly was 905.0 Mb in length with a contig N50 of 1.85 Mb. As has been  
382 seen in previous genome assembly projects (Chin et al., 2016), Falcon\_Unzip produced a  
383 smaller assembly with fewer contigs than the assembly produced by Falcon (Table 2). The  
384 phased primary assembly was then polished with Quiver, which yielded an assembly (“A7-  
385 phased-polished”) with 1,414 contigs spanning 903.6 Mb with an N50 of 1.86 Mb (Table 2).  
386 This polishing step closed 91 gaps in the assembly and improved the N50 by approximately  
387 14.3 kb. After polishing of the “unzipped” A7-phased-polished assembly, 9,971 secondary



388 contigs were resolved, covering 340.1 Mb of the genome assembly. The contig N50 of these  
389 secondary contigs was 38.2 kb, with over 99% of them being longer than 10 kb in size.  
390 Relative to the 903.6 Mb A7-phased-polished primary contig assembly, the secondary contigs  
391 covered 38% of the assembly size. To the best of our knowledge, this is the first published  
392 fish genome assembly that has been resolved to the haplotype level with Falcon\_Unzip.

393

#### 394 Scaffolding of the orange clownfish genome assembly into chromosomes

395 To build a chromosome-scale reference genome assembly of the orange clownfish, chromatin  
396 contact maps were generated by Phase Genomics (Fig. S1). Scaffolding was performed by the  
397 Proximo algorithm (Bickhart et al., 2017; Burton et al., 2013) on the A7-phased-polished  
398 assembly using 231 million Hi-C-based paired-end reads to produce the proximity guided  
399 assembly “A7-PGA” (Table 2). The contig clustering allowed the placement of 1,073 contigs  
400 into 24 scaffolds (chromosomes) with lengths ranging from 23.4 to 45.8 Mb (Tables 2 and 3).  
401 While only 76% of the contigs were assembled into chromosome clusters, this corresponds to  
402 98% (885.4 Mb) of total assembly length and represents 95% of the estimated genome size of  
403 938.9 Mb (Tables 2 and 3). This step substantially improved the overall assembly contiguity,  
404 raising the N50 20-fold from 1.86 to 38.1 Mb.

405

406 A quality score for the order and orientation of contigs within the A7-PGA assembly was  
407 determined. This metric is based on the differential log-likelihood of the contig orientation  
408 having produced the observed log-likelihood, relative to its neighbors (Burton et al., 2013).  
409 The orientation of a contig was deemed to be of high quality if its placement and orientation,  
410 relative to neighbors, was 100 times more likely than alternatives (Burton et al., 2013). In A7-  
411 PGA, the placements of 524 (37%) of the scaffolds were deemed to be of high quality,

412 accounting for 775.5 Mb (87%) of the scaffolded chromosomes, indicating the robustness of  
413 the assembly.

414

415 A final polishing step was performed with PBJelly to generate the final Nemo v1 assembly.  
416 This polishing step closed 369 gaps, thereby improving the contig N50 by 68% and increasing  
417 the total assembly length by 5.21 Mb (Tables 2 and 3). The length of each chromosome was  
418 increased, with a range of 23.7 to 46.1 Mb (Fig. 1B). Gaps were closed in each chromosome  
419 except for chromosome 14, leaving an average of only 28 gaps per chromosome (Table 3).  
420 The final assembly is 908.9 Mb in size and has contig and scaffold N50s of 3.12 and 38.4 Mb,  
421 respectively. The assembly is highly contiguous as can be observed by the fact that 50% of  
422 the genome length is contained within the largest 84 contigs. 890.2 Mb (98%) of the genome  
423 assembly size was scaffolded into 24 chromosomes, with only 18.8 Mb of the assembly  
424 failing to be grouped. The 18.8 Mb of unscaffolded assembly is comprised of 341 contigs  
425 with a contig N50 of only 57.8 kb.

426

#### 427 Validation of the orange clownfish genome assembly size

428 The final assembly size of 908.9 Mb is consistent with the results of a Feulgen image analysis  
429 densitometry-based study, which determined a C-value of 0.96 pg and thus a genome size of  
430 938.9 Mb for the orange clownfish (Hardie & Hebert, 2004). Furthermore, our assembly size  
431 is in keeping with estimates of genome size for other fish of the *Amphiprion* genus, which  
432 range from 792 to 1193 Mb (Gregory, 2018). We additionally validated the observed  
433 assembly size by using a k-mer based approach. Specifically, the k-mer coverage and  
434 frequency distribution were plotted and fitted with a four-component statistical model with  
435 GenomeScope (Fig. S2A). This allowed us to generate an estimate of genome size as well as

436 the repeat content and level of heterozygosity. However, varying the k-value from the  
437 recommended value of 21 up to 27 yielded a corresponding increase of the estimated genome  
438 size. We therefore used KmerGenie to determine the optimal k-mer length of 71 to capture the  
439 available sequence information. The utilization of small k-values might partially explain the  
440 reported tendency of GenomeScope to underestimate the genome size (Vurture et al., 2017).  
441 The final estimate of the haploid genome length by k-mer analysis was 906.6 Mb, with 732.8  
442 Mb (80%) of unique sequence and a repeat content of 173.8 Mb (19%). Furthermore, the  
443 estimated heterozygosity level of 0.12% is low considering that an F1 offspring of wild  
444 caught fish was sequenced (Fig. S2B). While the short-read k-mer based genome size  
445 estimate of 906.6 Mb matches the final assembly size of 908.9 Mb very well, the C-value  
446 derived genome size estimate is slightly larger (938.9 Mb). As an additional validation of the  
447 accuracy of the genome assembly, we mapped the trimmed Illumina short reads to the Nemo  
448 v1 assembly and observed that 95% of the reads mapped to the assembly and that 84% of the  
449 reads were properly paired.

450

451 Based on the C-value derived genome size estimate, there is approximately 29.9 Mb (3.3%)  
452 of sequence length absent from our genome assembly. It seems likely that our assembly is  
453 nearly complete for the euchromatic regions of the genome given our assessment of genome  
454 size and gene content completeness. However, genomic regions such as the proximal and  
455 distal boundaries of euchromatic regions contain heterochromatic and telomeric repeats,  
456 respectively, are refractory to currently available sequencing techniques and are typically  
457 absent from genome assemblies (Bickhart et al., 2017; Hoskins et al., 2007).

458

459 Chromosome-scale fish genome assembly comparisons

460 To date, chromosome-scale genome assemblies have been released for 26 other fish species  
461 (Table S3). Here, we present the first chromosome-scale assembly of a tropical coral reef fish,  
462 the orange clownfish. As a measure of genome assembly quality, we assessed the contiguity  
463 and completeness of these 27 chromosome-scale genome assemblies. We investigated  
464 genome contiguity with the contig N50 metric and characterized genome completeness for  
465 each genome assembly by calculating the proportion of the estimated genome size that was  
466 assigned to chromosomes. As shown in Fig. 1C, the orange clownfish genome assembly is  
467 highly contiguous, with a scaffold-scale contig N50 of 1.86 Mb, which is only surpassed by  
468 the contig N50 of the Nile tilapia genome assembly. Interestingly, even though different  
469 assembler algorithms were utilized, the three genome assemblies based primarily on long read  
470 PacBio technology were the most contiguous, with only Nile tilapia (3.09 Mb, Canu), orange  
471 clownfish (1.86 Mb, Falcon) and Asian seabass (1.19 Mb, HGAP) genome assemblies  
472 yielding contig N50s in excess of 1 Mb.

473  
474 While the use of long read sequencing technologies facilitates the production of highly  
475 contiguous genome assemblies, scaffold sizes are still much shorter than the length of the  
476 underlying chromosomes. The use of further scaffolding technologies such as genetic linkage  
477 maps, scaffolding based on synteny with genome assemblies from related organisms, as well  
478 as *in vitro* and *in vivo* Hi-C based methods has allowed for the production of assemblies with  
479 chromosome-sized scaffolds. Here, the use of Hi-C based chromatin contact maps allowed for  
480 the placement of 98% of the Nemo v1 assembly length (890.2 of 908.9 Mb) into  
481 chromosomes, yielding a final assembly with a scaffold N50 of 38.4 Mb. This corresponds to  
482 95% of the estimated genome size (938.9 Mb), which suggests that the Nemo v1 assembly is  
483 one of the most complete fish genome assemblies published to date (Fig. 1C). Only the

484 zebrafish (94%) and Atlantic cod (91%) genome assemblies had a comparably high  
485 proportion of their estimated genome sizes scaffolded into chromosome-length scaffolds (Fig.  
486 1C). It is likely that the use of both PacBio long reads and Hi-C based chromatin contact maps  
487 contributed to the very high proportion of the orange clownfish genome that we were able to  
488 both sequence and assemble into chromosomes.

489

490 While assembly contiguity is important, genome completeness with respect to gene content is  
491 also vital for producing a genome assembly that will be utilized by the research community.  
492 We evaluated the completeness of the 27 chromosome-scale assemblies with BUSCO and the  
493 Actinopterygii lineage, which encompasses 4,584 highly-conserved genes. When ranked by  
494 the total of complete (single copy and duplicate) genes, the orange clownfish assembly is the  
495 second most complete, with 4,456 (97.2%) of the orthologs identified (Fig. 2). The top ranked  
496 assembly, Nile tilapia, contains only 9 more of the core set of orthologs such that it contains  
497 4,465 of the orthologs (97.4%). While the assemblies based on PacBio long read technology  
498 are again amongst the most complete, it should also be noted that most of the assemblies  
499 analyzed showed a very high level of completeness.

500

#### 501 Genome annotation

502 To annotate repetitive sequences and transposable elements, we constructed an orange  
503 clownfish-specific library by combining the results of Repeatmodeler, LTRharvest and  
504 TransposonPSI. Duplicate sequences were removed and false positives were identified using  
505 three classification protocols (Censor, Dfam, RepeatClassifier) as well as comparisons to  
506 Uniprot/Swissprot databases. After these filtering steps, we identified 21,644 repetitive  
507 sequences. These sequences, in combination with the zebrafish library of RepBase, were then

508 used for genome masking with RepeatMasker. This lead to a total of 28% of the assembly  
509 being identified as repetitive (Fig. 3A and Table S4). It was observed that there is a general  
510 trend for increased repeat density towards the ends of chromosome arms (Fig. 3B and S2).  
511 The total fraction of repetitive genomic sequence is in good agreement with other related fish  
512 species (Chalopin, Naville, Plard, Galiana, & Volff, 2015). Similarly, the high fraction of  
513 DNA transposons (~10%) is in line with DNA transposon content in other fish species  
514 (Chalopin et al., 2015) but is substantially higher that what has been reported in mammals  
515 (~3%) (Chalopin et al., 2015; Lander et al., 2001).

516

517 Following the characterization of repetitive sequences in the Nemo v1 genome assembly,  
518 gene annotation was performed with the BRAKER1 pipeline, which trained the AUGUSTUS  
519 gene predictor with supplied RNA-seq data, and a successive refinement with the MAKER2  
520 pipeline. We provided BRAKER1 with mapped RNA-seq data from 10 different tissues. This  
521 initial annotation comprised 49,881 genes with 55,273 transcripts. The gene finder models of  
522 SNAP and AUGUSTUS were refined based on the initial annotation, and MAKER2 was then  
523 used to improve the annotation using the new models and the available protein homology and  
524 RNA-seq evidence. The resulting annotation contained 26,606 genes and 35,498 transcripts,  
525 which feature a low mean AED of 0.12, indicating a very good agreement with the provided  
526 evidence. After retaining only genes with evidence support (AED of less than 1) or an  
527 annotated Pfam protein domain, the filtered annotation was comprised of 26,597 genes,  
528 corresponding to 35,478 transcripts (Table 4). This result is broadly consistent with the  
529 average number of genes (23,475) found in the 22 diploid fish species considered in this study  
530 (Table S3). Compared to the initial annotation, genes in the final annotation are 61% longer  
531 (13,049 bp) and encode mRNAs that are 80% longer (17,727 bp). The proportion of the

532 genome that is covered by coding sequences also increased to 8.1% in the final annotation.  
533 Together with the observed reduction in the gene number by 47%, this indicates a substantial  
534 reduction of likely false positive gene annotations of short length and/or few exons. The gene  
535 density across the 24 chromosomes of our assembly varied from 23.6 genes/Mb (chromosome  
536 21) to 36.5 genes/Mb (chromosome 14), with a genome-wide average of one gene every 29.7  
537 Mb (Table 3). The spatial distribution of genes across all 24 chromosomes is relatively even  
538 (Fig. 1B), with regions of very low gene density presumably corresponding to centromeric  
539 regions. We observed that the longest annotated gene was APERC1\_00006329 (26.5 kb),  
540 which encodes the extracellular matrix protein FRAS1, while the gene coding for the longest  
541 protein sequence was APERC1\_00011517, which codes for the 18,851 amino acid protein,  
542 Titin. Functional annotation was carried out using Blast2GO and yielded annotations for  
543 22,507 genes (85%) after aligning the protein sequences to the UniProt/Swissprot database  
544 and annotating protein domains with InterProScan.

545

#### 546 Identification of orange clownfish-specific genes

547 To investigate the gene space of the orange clownfish relative to other fishes, we used  
548 OrthoFinder v1.1.4 (Emms & Kelly, 2015) to identify orthologous relationships between the  
549 protein sequences of the orange clownfish and four other fish species (Asian seabass, Nile  
550 tilapia, southern platyfish and zebrafish) from across the teleost phylogenetic tree (Betancur-  
551 R. et al., 2013). The vast majority of sequences (89%) could be assigned to one of 19,838  
552 orthogroups, with the remainder identified as “singlets” with no clear orthologs. We observed  
553 a high degree of overlap of protein sequence sets between all five species, with 75% of all  
554 orthogroups (14,783) shared amongst all species (Fig. 4A). The proteins within these  
555 orthogroups presumably correspond to the core set of teleost genes. Of the 14,783

556 orthogroups with at least one sequence from each species, a subset of 8,905 orthogroups  
557 contained only a single sequence from each species. The phylogeny obtained from these  
558 single-copy orthologous gene sequences (Fig. 4B) is consistent with the known phylogenetic  
559 tree of teleost fishes (Betancur-R. et al., 2013). Interestingly, we identified a total of 4,429  
560 sequences that are specific to the orange clownfish, 2,293 (49%) of which possess functional  
561 annotations (Fig. 4A). Future investigations will focus on the characterization of these unique  
562 genes and what roles they may play in orange clownfish phenotypic traits.

563

564

## 565 **Conclusion**

566 Here, we present a reference-quality genome assembly of the iconic orange clownfish, *A.*  
567 *percula*. We sequenced the genome to a depth of 121X with PacBio long reads and performed  
568 a primary assembly with these reads utilizing the Falcon\_Unzip algorithm. The primary  
569 assembly was polished to yield an initial assembly of 903.6 Mb with a contig N50 value of  
570 1.86 Mb. These contigs were then assembled into chromosome-sized scaffolds using Hi-C  
571 chromatin contact maps, followed by gap-filling with the PacBio reads, to produce the final  
572 reference assembly, Nemo v1. The Nemo v1 assembly is highly contiguous, with contig and  
573 scaffold N50s of 3.12 and 38.4 Mb, respectively. The use of Hi-C chromatin contact maps  
574 allowed us to scaffold 890.2 Mb (98%) of the 908.2 Mb final assembly into the 24  
575 chromosomes of the orange clownfish. An analysis of the core set of Actinopterygii genes  
576 suggests that our assembly is nearly complete, containing 97% of the core set of highly  
577 conserved genes. The Nemo v1 assembly was annotated with 26,597 genes with an average  
578 AED score of 0.12, suggesting that most gene models are highly supported.

579



580 The high-quality Nemo v1 reference genome assembly described here will facilitate the use of  
581 this now genome-enabled model species to investigate ecological, environmental and  
582 evolutionary aspects of reef fishes. To assist the research community, we have created the  
583 Nemo Genome DB database, <http://nemogenome.org/> (Fig. 5), where researchers can access,  
584 mine and visualize the genomic and transcriptomic resources of the orange clownfish.

585

586

587 **Acknowledgements**

588 This study was supported by the Competitive Research Funds OCRF-2014-CRG3-62140408  
589 from the King Abdullah University of Science and Technology (KAUST) to T.R., M.L.B. and  
590 P.L.M., as well as KAUST baseline support to M.L.B., M.A., T.G. and T.R. This project was  
591 completed under JCU Ethics A1233 and A1415. We thank Dr. Jennifer Donelson and staff at  
592 JCU's MARFU facility for assistance with animal husbandry, Dr. Susanne Sprungala for  
593 DNA extraction for Illumina library preparation, KAUST BCL for the PacBio sequencing,  
594 Dr. Hicham Mansour for sequencing advice and Dr. Rita Bartossek for the PacBio library  
595 preparations. We thank Dr. Salim Bougouffa for stimulating discussions. We also  
596 acknowledge Mr. Tane Sinclair-Taylor for providing the photograph of the orange clownfish  
597 (Fig. 1A). This paper is dedicated to our good friend and colleague, Dr. Sylvain Foret.

598

599

600 **Author contributions**

601 R.L. and D.J.L. designed and performed the computational analysis. R.L., T.R., C.S. and  
602 D.J.L. interpreted the results. H.O., K.M. and T.G. created the database. C.T.M. and S.F.  
603 produced sequencing libraries. R.L., D.J.L., T.R., P.L.M., M.L.B., M.A. and D.J.M. wrote the  
604 manuscript and all authors approved the final version. T.R. supervised the project.

605

606

607

608 **References**

609

610 Almany, G. R., Planes, S., Thorrold, S. R., Berumen, M. L., Bode, M., Saenz-Agudelo, P., ...

611 Jones, G. P. (2017). Larval fish dispersal in a coral-reef seascape. *Nature Ecology &*  
612 *Evolution*, 1(6), 148.

613 Arai, R., & Inoue, M. (1976). Chromosomes of seven species of Pomacentridae and two  
614 species of Acanthuridae from Japan. *Bulletin of the National Museum of Nature and*  
615 *Science, Series A*, 2, 73–78.

616 Arai, R., Inoue, M., & Ida, H. (1976). Chromosomes of four species of coral fishes from  
617 Japan. *Bulletin of the National Museum of Nature and Science, Series A*, 2, 137–141.

618 Bao, W., Kojima, K. K., & Kohany, O. (2015). Repbase Update, a database of repetitive  
619 elements in eukaryotic genomes. *Mobile DNA*, 6(1), 11.

620 Berumen, M. L., Almany, G. R., Planes, S., Jones, G. P., Saenz-Agudelo, P., & Thorrold, S.  
621 R. (2012). Persistence of self-recruitment and patterns of larval connectivity in a marine  
622 protected area network. *Ecology and Evolution*, 2(2), 444–452.

623 Betancur-R., R., Broughton, R. E., Wiley, E. O., Carpenter, K., López, J. A., Li, C., ... Ortí,  
624 G. (2013). The tree of life and a new classification of bony fishes. *PLoS Currents*, 5,  
625 ecurrents.tol.53ba26640df0ccae75bb165c8c26288.

626 Bickhart, D. M., Rosen, B. D., Koren, S., Sayre, B. L., Hastie, A. R., Chan, S., ... Smith, T. P.  
627 L. (2017). Single-molecule sequencing and chromatin conformation capture enable *de*  
628 *novo* reference assembly of the domestic goat genome. *Nature Genetics*, 49(4), 643–650.

629 Bolger, A. M., Lohse, M., & Usadel, B. (2014). Trimmomatic: A flexible trimmer for  
630 Illumina sequence data. *Bioinformatics*, 30(15).

631 Bradnam, K. R., Fass, J. N., Alexandrov, A., Baranay, P., Bechner, M., Birol, I., ... Korf, I. F.  
632 (2013). Assemblathon 2: evaluating *de novo* methods of genome assembly in three  
633 vertebrate species. *GigaScience*, 2(1), 10.

634 Buels, R., Yao, E., Diesh, C. M., Hayes, R. D., Munoz-Torres, M., Helt, G., ... Holmes, I. H.  
635 (2016). JBrowse: a dynamic web platform for genome visualization and analysis.  
636 *Genome Biology*, 17(1), 66.

637 Burton, J. N., Adey, A., Patwardhan, R. P., Qiu, R., Kitzman, J. O., & Shendure, J. (2013).  
638 Chromosome-scale scaffolding of *de novo* genome assemblies based on chromatin  
639 interactions. *Nature Biotechnology*, 31(12), 1119–1125.

- 640 Buston, P. M. (2003). Mortality is associated with social rank in the clown anemonefish  
641 (*Amphiprion percula*). *Marine Biology*, 143(4), 811–815.
- 642 Buston, P. M., Bogdanowicz, S. M., Wong, A., & Harrison, R. G. (2007). Are clownfish  
643 groups composed of close relatives? An analysis of microsatellite DNA variation in  
644 *Amphiprion percula*. *Molecular Ecology*, 16(17), 3671–3678.
- 645 Buston, P. M., & García, M. B. (2007). An extraordinary life span estimate for the clown  
646 anemonefish *Amphiprion percula*. *Journal of Fish Biology*, 70(6), 1710–1719.
- 647 Buston, P. M., & Wong, M. (2014). Why some animals forgo reproduction in complex  
648 societies. *American Scientist*, 102(4), 290.
- 649 Campbell, M. S., Holt, C., Moore, B., & Yandell, M. (2014). Genome Annotation and  
650 Curation Using MAKER and MAKER-P. In *Current Protocols in Bioinformatics* (Vol.  
651 48, p. 4.11.1-4.11.39). Hoboken, NJ, USA: John Wiley & Sons, Inc.
- 652 Chaisson, M. J., & Tesler, G. (2012). Mapping single molecule sequencing reads using basic  
653 local alignment with successive refinement (BLASR): application and theory. *BMC*  
654 *Bioinformatics*, 13(1), 238.
- 655 Chalopin, D., Naville, M., Plard, F., Galiana, D., & Volff, J.-N. (2015). Comparative analysis  
656 of transposable elements highlights mobilome diversity and evolution in vertebrates.  
657 *Genome Biology and Evolution*, 7(2), 567–580.
- 658 Chikhi, R., & Medvedev, P. (2014). Informed and automated k-mer size selection for genome  
659 assembly. *Bioinformatics*, 30(1), 31–37.
- 660 Chin, C.-S., Alexander, D. H., Marks, P., Klammer, A. A., Drake, J., Heiner, C., ... Korlach,  
661 J. (2013). Nonhybrid, finished microbial genome assemblies from long-read SMRT  
662 sequencing data. *Nature Methods*, 10(6), 563–569.
- 663 Chin, C.-S., Peluso, P., Sedlazeck, F. J., Nattestad, M., Concepcion, G. T., Clum, A., ...  
664 Schatz, M. C. (2016). Phased diploid genome assembly with single-molecule real-time  
665 sequencing. *Nature Methods*, 13, 1050–1054.
- 666 Dixon, D. L. (2012). Predation risk assessment by larval reef fishes during settlement-site  
667 selection. *Coral Reefs*, 31(1), 255–261.
- 668 Dixon, D. L., Jones, G. P., Munday, P. L., Planes, S., Pratchett, M. S., Srinivasan, M., ...  
669 Thorrold, S. R. (2008). Coral reef fish smell leaves to find island homes. *Proceedings.*  
670 *Biological Sciences*, 275(1653), 2831–2839.
- 671 Dixon, D. L., Jones, G. P., Munday, P. L., Planes, S., Pratchett, M. S., & Thorrold, S. R.

- 672 (2014). Experimental evaluation of imprinting and the role innate preference plays in  
673 habitat selection in a coral reef fish. *Oecologia*, *174*(1), 99–107.
- 674 Dixon, D. L., Munday, P. L., & Jones, G. P. (2010). Ocean acidification disrupts the innate  
675 ability of fish to detect predator olfactory cues. *Ecology Letters*, *13*(1), 68–75.
- 676 Dobin, A., Davis, C. A., Schlesinger, F., Drenkow, J., Zaleski, C., Jha, S., ... Gingeras, T. R.  
677 (2013). STAR: ultrafast universal RNA-seq aligner. *Bioinformatics*, *29*(1), 15–21.
- 678 Edgar, R. C. (2010). Search and clustering orders of magnitude faster than BLAST.  
679 *Bioinformatics*, *26*(19), 2460–2461.
- 680 Ellinghaus, D., Kurtz, S., & Willhoeft, U. (2008). LTRharvest, an efficient and flexible  
681 software for *de novo* detection of LTR retrotransposons. *BMC Bioinformatics*, *9*(1), 18.
- 682 Elliott, J. K., & Mariscal, R. N. (2001). Coexistence of nine anemonefish species: differential  
683 host and habitat utilization, size and recruitment. *Marine Biology*, *138*(1), 23–36.
- 684 Emms, D. M., & Kelly, S. (2015). OrthoFinder: solving fundamental biases in whole genome  
685 comparisons dramatically improves orthogroup inference accuracy. *Genome Biology*,  
686 *16*(1), 157.
- 687 Emms, D. M., & Kelly, S. (2017). STRIDE: Species tree root inference from gene duplication  
688 events. *Molecular Biology and Evolution*, *34*(12), 3267–3278.
- 689 English, A. C., Richards, S., Han, Y., Wang, M., Vee, V., Qu, J., ... Gibbs, R. A. (2012).  
690 Mind the Gap: Upgrading genomes with Pacific Biosciences RS long-read sequencing  
691 technology. *PLoS ONE*, *7*(11), e47768.
- 692 Fautin, D. G. (1991). The anemonefish symbiosis: what is known and what is not. *Symbiosis*,  
693 *10*, 23–46.
- 694 Fautin, D. G., & Allen, G. R. (1997). Life history of Anemonefishes. In: Anemone fishes and  
695 their host sea anemones. *Western Australian Museum, Perth*, 1–142.
- 696 Gotz, S., Garcia-Gomez, J. M., Terol, J., Williams, T. D., Nagaraj, S. H., Nueda, M. J., ...  
697 Conesa, A. (2008). High-throughput functional annotation and data mining with the  
698 Blast2GO suite. *Nucleic Acids Research*, *36*(10), 3420–3435.
- 699 Grabherr, M. G., Haas, B. J., Yassour, M., Levin, J. Z., Thompson, D. A., Amit, I., ... Regev,  
700 A. (2011). Full-length transcriptome assembly from RNA-Seq data without a reference  
701 genome. *Nature Biotechnology*, *29*(7), 644–652.
- 702 Gregory, T. R. (2018). Animal Genome Size Database. Retrieved from  
703 <http://www.genomesize.com>

- 704 Gremme, G., Steinbiss, S., & Kurtz, S. (2013). GenomeTools: a comprehensive software  
705 library for efficient processing of structured genome annotations. *IEEE/ACM*  
706 *Transactions on Computational Biology and Bioinformatics*, *10*(3), 645–656.
- 707 Gurevich, A., Saveliev, V., Vyahhi, N., & Tesler, G. (2013). QUASt: quality assessment tool  
708 for genome assemblies. *Bioinformatics*, *29*(8), 1072–1075.
- 709 Haas, B. J. (2018). TransposonPSI. Retrieved from <http://transposonpsi.sourceforge.net/>
- 710 Hardie, D. C., & Hebert, P. D. (2004). Genome-size evolution in fishes. *Canadian Journal of*  
711 *Fisheries and Aquatic Sciences*, *61*(9), 1636–1646.
- 712 Herbert, N. A., Bröhl, S., Springer, K., & Kunzmann, A. (2017). Clownfish in hypoxic  
713 anemones replenish host O<sub>2</sub> at only localised scales. *Scientific Reports*, *7*(1), 6547.
- 714 Hess, S., Wenger, A. S., Ainsworth, T. D., & Rummer, J. L. (2015). Exposure of clownfish  
715 larvae to suspended sediment levels found on the Great Barrier Reef: Impacts on gill  
716 structure and microbiome. *Scientific Reports*, *5*(1), 10561.
- 717 Hoff, K. J., Lange, S., Lomsadze, A., Borodovsky, M., & Stanke, M. (2016). BRAKER1:  
718 Unsupervised RNA-Seq-based genome annotation with GeneMark-ET and  
719 AUGUSTUS. *Bioinformatics*, *32*(5), 767–769.
- 720 Holbrook, S. J., & Schmitt, R. J. (2005). Growth, reproduction and survival of a tropical sea  
721 anemone (Actiniaria): benefits of hosting anemonefish. *Coral Reefs*, *24*(1), 67–73.
- 722 Holt, C., & Yandell, M. (2011). MAKER2: an annotation pipeline and genome-database  
723 management tool for second-generation genome projects. *BMC Bioinformatics*, *12*(1),  
724 491.
- 725 Hoskins, R. A., Carlson, J. W., Kennedy, C., Acevedo, D., Evans-Holm, M., Frise, E., ...  
726 Celniker, S. E. (2007). Sequence finishing and mapping of *Drosophila melanogaster*  
727 heterochromatin. *Science (New York, N.Y.)*, *316*(5831), 1625–1628.
- 728 Jarrold, M. D., Humphrey, C., McCormick, M. I., & Munday, P. L. (2017). Diel CO<sub>2</sub> cycles  
729 reduce severity of behavioural abnormalities in coral reef fish under ocean acidification.  
730 *Scientific Reports*, *7*(1), 10153.
- 731 Jurka, J., Klonowski, P., Dagman, V., & Pelton, P. (1996). CENSOR--a program for  
732 identification and elimination of repetitive elements from DNA sequences. *Computers &*  
733 *Chemistry*, *20*(1), 119–121.
- 734 Korf, I. (2004). Gene finding in novel genomes. *BMC Bioinformatics*, *5*, 59.
- 735 Lander, E. S., Linton, L. M., Birren, B., Nusbaum, C., Zody, M. C., Baldwin, J., ...

- 736 International Human Genome Sequencing Consortium. (2001). Initial sequencing and  
737 analysis of the human genome. *Nature*, 409(6822), 860–921.
- 738 Li, H., & Durbin, R. (2010). Fast and accurate long-read alignment with Burrows-Wheeler  
739 transform. *Bioinformatics*, 26(5), 589–595.
- 740 Li, H., Handsaker, B., Wysoker, A., Fennell, T., Ruan, J., Homer, N., ... 1000 Genome  
741 Project Data Processing Subgroup. (2009). The sequence alignment/map format and  
742 SAMtools. *Bioinformatics*, 25(16), 2078–2079.
- 743 Li, J., Chen, X., Kang, B., & Liu, M. (2015). Mitochondrial DNA Genomes Organization and  
744 Phylogenetic Relationships Analysis of Eight Anemonefishes (Pomacentridae:  
745 Amphiprioninae). *PLoS ONE*, 10(4), e0123894.
- 746 Litsios, G., Pearman, P. B., Lanterbecq, D., Tolou, N., & Salamin, N. (2014). The radiation of  
747 the clownfishes has two geographical replicates. *Journal of Biogeography*, 41(11),  
748 2140–2149.
- 749 Litsios, G., & Salamin, N. (2014). Hybridisation and diversification in the adaptive radiation  
750 of clownfishes. *BMC Evolutionary Biology*, 14(1), 245.
- 751 Manassa, R. P., Dixson, D. L., McCormick, M. I., & Chivers, D. P. (2013). Coral reef fish  
752 incorporate multiple sources of visual and chemical information to mediate predation  
753 risk. *Animal Behaviour*, 86(4), 717–722.
- 754 Marçais, G., & Kingsford, C. (2011). A fast, lock-free approach for efficient parallel counting  
755 of occurrences of k-mers. *Bioinformatics*, 27(6), 764–770.
- 756 Marcionetti, A., Rossier, V., Bertrand, J. A. M., Litsios, G., & Salamin, N. (2018). First draft  
757 genome of an iconic clownfish species (*Amphiprion frenatus*). *Molecular Ecology*  
758 *Resources*.
- 759 McLeod, I. M., Rummer, J. L., Clark, T. D., Jones, G. P., McCormick, M. I., Wenger, A. S.,  
760 & Munday, P. L. (2013). Climate change and the performance of larval coral reef fishes:  
761 the interaction between temperature and food availability. *Conservation Physiology*,  
762 1(1), cot024.
- 763 Mebs, D. (2009). Chemical biology of the mutualistic relationships of sea anemones with fish  
764 and crustaceans. *Toxicon : Official Journal of the International Society on Toxinology*,  
765 54(8), 1071–1074.
- 766 Molina, W. F., & Galetti, P. M. (2004). Karyotypic changes associated to the dispersive  
767 potential on Pomacentridae (Pisces, Perciformes). *Journal of Experimental Marine*



- 768 *Biology and Ecology*, 309(1), 109–119.
- 769 Munday, P. L., Dixon, D. L., Donelson, J. M., Jones, G. P., Pratchett, M. S., Devitsina, G. V,  
770 & Døving, K. B. (2009). Ocean acidification impairs olfactory discrimination and  
771 homing ability of a marine fish. *Proceedings of the National Academy of Sciences of the*  
772 *United States of America*, 106(6), 1848–1852.
- 773 Nilsson, G. E., Dixon, D. L., Domenici, P., McCormick, M. I., Sørensen, C., Watson, S.-A.,  
774 & Munday, P. L. (2012). Near-future carbon dioxide levels alter fish behaviour by  
775 interfering with neurotransmitter function. *Nature Climate Change*, 2(3), 201–204.
- 776 Peichel, C. L., Sullivan, S. T., Liachko, I., & White, M. A. (2017). Improvement of the  
777 Threespine Stickleback genome using a Hi-C-Based proximity-guided assembly. *The*  
778 *Journal of Heredity*, 108(6), 693–700.
- 779 Pertea, M., Kim, D., Pertea, G. M., Leek, J. T., & Salzberg, S. L. (2016). Transcript-level  
780 expression analysis of RNA-seq experiments with HISAT, StringTie and Ballgown.  
781 *Nature Protocols*, 11(9), 1650–1667.
- 782 Pinsky, M. L., Saenz-Agudelo, P., Salles, O. C., Almany, G. R., Bode, M., Berumen, M. L.,  
783 ... Planes, S. (2017). Marine dispersal scales are congruent over evolutionary and  
784 ecological time. *Current Biology*, 27(1), 149–154.
- 785 Planes, S., Jones, G. P., & Thorrold, S. R. (2009). Larval dispersal connects fish populations  
786 in a network of marine protected areas. *Proceedings of the National Academy of Sciences*  
787 *of the United States of America*, 106(14), 5693–5697.
- 788 Saenz-Agudelo, P., Jones, G. P., Thorrold, S. R., & Planes, S. (2011). Detrimental effects of  
789 host anemone bleaching on anemonefish populations. *Coral Reefs*, 30(2), 497–506.
- 790 Salles, O. C., Pujol, B., Maynard, J. A., Almany, G. R., Berumen, M. L., Jones, G. P., ...  
791 Planes, S. (2016). First genealogy for a wild marine fish population reveals  
792 multigenerational philopatry. *Proceedings of the National Academy of Sciences*, 113(46),  
793 13245–13250.
- 794 Schmiede, P. F. P., D'Aloia, C. C., & Buston, P. M. (2017). Anemonefish personalities  
795 influence the strength of mutualistic interactions with host sea anemones. *Marine*  
796 *Biology*, 164(1), 24.
- 797 Scott, A., & Dixon, D. L. (2016). Reef fishes can recognize bleached habitat during  
798 settlement: sea anemone bleaching alters anemonefish host selection. *Proceedings.*  
799 *Biological Sciences*, 283(1831), 20152694.



- 800 Simão, F. A., Waterhouse, R. M., Ioannidis, P., Kriventseva, E. V., & Zdobnov, E. M. (2015).  
801 BUSCO: assessing genome assembly and annotation completeness with single-copy  
802 orthologs. *Bioinformatics*, *31*(19), 3210–3212.
- 803 Simpson, S. D., Munday, P. L., Wittenrich, M. L., Manassa, R., Dixson, D. L., Gagliano, M.,  
804 & Yan, H. Y. (2011). Ocean acidification erodes crucial auditory behaviour in a marine  
805 fish. *Biology Letters*, *7*(6), 917–920.
- 806 Smit, A. F. A., & Hubley, R. (2008). RepeatModeler Open-1.0.
- 807 Smit, A. F. A., Hubley, R., & Green, P. (2010). RepeatMasker Open-4.0.
- 808 Stanke, M., Keller, O., Gunduz, I., Hayes, A., Waack, S., & Morgenstern, B. (2006).  
809 AUGUSTUS: *ab initio* prediction of alternative transcripts. *Nucleic Acids Research*,  
810 *34*(Web Server), W435–W439.
- 811 Steinbiss, S., Willhoeft, U., Gremme, G., & Kurtz, S. (2009). Fine-grained annotation and  
812 classification of *de novo* predicted LTR retrotransposons. *Nucleic Acids Research*,  
813 *37*(21), 7002–7013.
- 814 Stillman, J. H., & Armstrong, E. (2015). Genomics Are Transforming Our Understanding of  
815 Responses to Climate Change. *BioScience*, *65*(3), 237–246.
- 816 Supiwong, W., Tanomtong, A., Pinthong, K., Kaewmad, P., Poungnak, P., & Jangsuwan, N.  
817 (2015). The first chromosomal characteristics of nucleolar organizer regions and  
818 karyological analysis of pink anemonefish, *Amphiprion perideraion* (Perciformes,  
819 Amphiprioninae). *Cytologica*, *80*(3), 271–278.
- 820 Szczebak, J. T., Henry, R. P., Al-Horani, F. A., & Chadwick, N. E. (2013). Anemonefish  
821 oxygenate their anemone hosts at night. *Journal of Experimental Biology*, *216*(6), 970–  
822 976.
- 823 Takai, A., & Kosuga, S. (2007). Karyotypes and banded chromosomal features in two  
824 anemonefishes (Pomacentridae, Perciformes). *Chromosome Science*, *10*(3), 71–74.
- 825 Tan, M. H., Austin, C. M., Hammer, M. P., Lee, Y. P., Croft, L. J., & Gan, H. M. (2018).  
826 Finding Nemo: Hybrid assembly with Oxford Nanopore and Illumina reads greatly  
827 improves the Clownfish (*Amphiprion ocellaris*) genome assembly. *GigaScience*, gix137.
- 828 Tanomtong, A., Supiwong, W., Chaveerach, A., Khakhong, S., Tanee, T., & Sanoamuang, L.  
829 (2012). First report of chromosome analysis of saddleback anemonefish, *Amphiprion*  
830 *polymnus* (Perciformes, Amphiprioninae), in Thailand. *Cytologica*, *77*(4), 441–446.
- 831 Ter-Hovhannisyan, V., Lomsadze, A., Chernoff, Y. O., & Borodovsky, M. (2008). Gene

- 832 prediction in novel fungal genomes using an *ab initio* algorithm with unsupervised  
833 training. *Genome Research*, 18(12), 1979–1990.
- 834 Vurture, G. W., Sedlazeck, F. J., Nattestad, M., Underwood, C. J., Fang, H., Gurtowski, J., &  
835 Schatz, M. C. (2017). GenomeScope: fast reference-free genome profiling from short  
836 reads. *Bioinformatics*, 33(14), 2202–2204.
- 837 Wenger, A. S., McCormick, M. I., Endo, G. G. K., McLeod, I. M., Kroon, F. J., & Jones, G.  
838 P. (2014). Suspended sediment prolongs larval development in a coral reef fish. *The*  
839 *Journal of Experimental Biology*, 217(Pt 7), 1122–1128.
- 840 Wheeler, T. J., Clements, J., Eddy, S. R., Hubley, R., Jones, T. A., Jurka, J., ... Finn, R. D.  
841 (2012). Dfam: a database of repetitive DNA based on profile hidden Markov models.  
842 *Nucleic Acids Research*, 41, D70–D82.
- 843 Wittenrich, M. L., Turingan, R. G., & Creswell, R. L. (2007). Spawning, early development  
844 and first feeding in the gobiid fish *Priolepis nocturna*. *Aquaculture*, 270(1–4), 132–141.
- 845 Wong, M., Uppaluri, C., Medina, A., Seymour, J., & Buston, P. M. (2016). The four elements  
846 of within-group conflict in animal societies: an experimental test using the clown  
847 anemonefish, *Amphiprion percula*. *Behavioral Ecology and Sociobiology*, 70(9), 1467–  
848 1475.
- 849 Wood, D. E., & Salzberg, S. L. (2014). Kraken: ultrafast metagenomic sequence classification  
850 using exact alignments. *Genome Biology*, 15(3), R46.
- 851
- 852

853 **Data Accessibility**

854 The assembled and annotated genome as well as the raw PacBio reads and Illumina reads are  
855 available at the Nemo Genome DB (<http://nemogenome.org>). Furthermore, the assembled  
856 genome will be available on GenBank as BioProject PRJNA436093 and BioSample accession  
857 SAMN08615572. All raw sequencing data described in this study will be available via the  
858 NCBI Sequencing Read Archive.

859 **Tables and Figures**

860

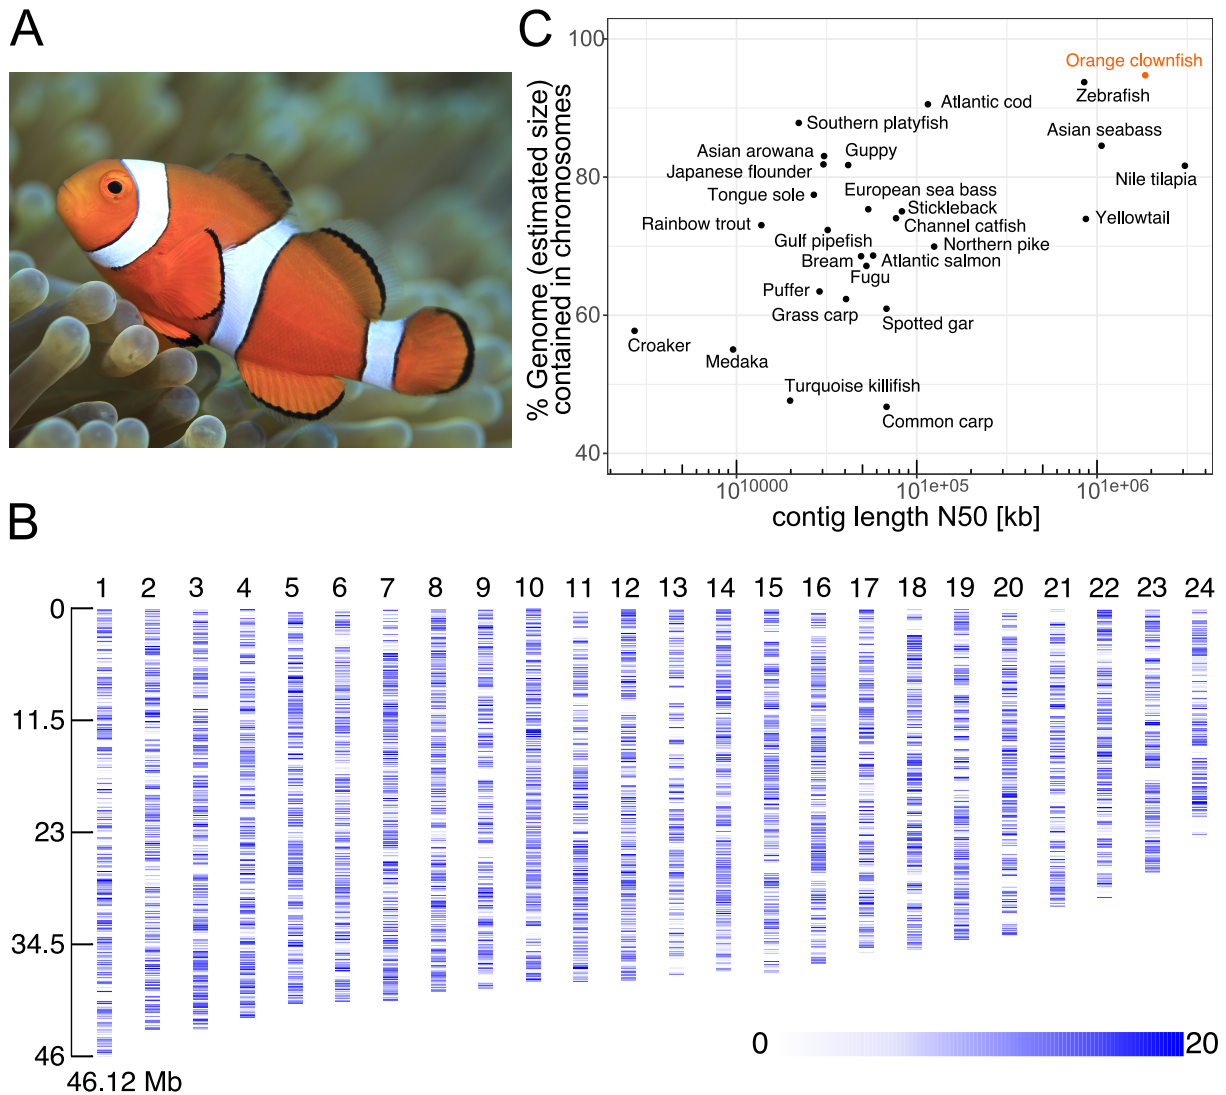

861

862 **Fig. 1 (A)** The iconic orange clownfish (*A. percula*). **(B)** Gene density on the 24  
863 chromosomes, plotted in 100 kb windows. Chromosomes are ordered by size, as indicated on  
864 the left axis in Mb. **(C)** Contiguity (x-axis) and genome assembly completeness (y-axis) of the  
865 orange clownfish, and the 26 previously published, chromosome-scale fish genome  
866 assemblies. Details and statistics of the 27 assemblies are presented in Table S3.

867

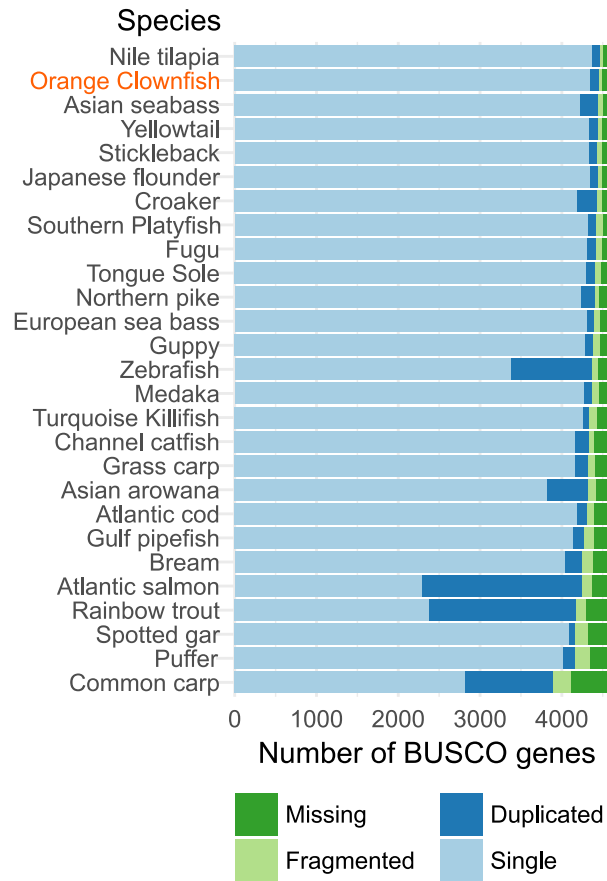

868

869

870 **Fig. 2** Genome assembly completeness of all published chromosome-scale fish genome  
871 assemblies, as measured by the proportion of the BUSCO set of core genes detected in each  
872 assembly. Genome assemblies on the y-axis are sorted by the sum of single copy and  
873 duplicated BUSCO genes.

874

875

876

877

878

879

880  
881  
882

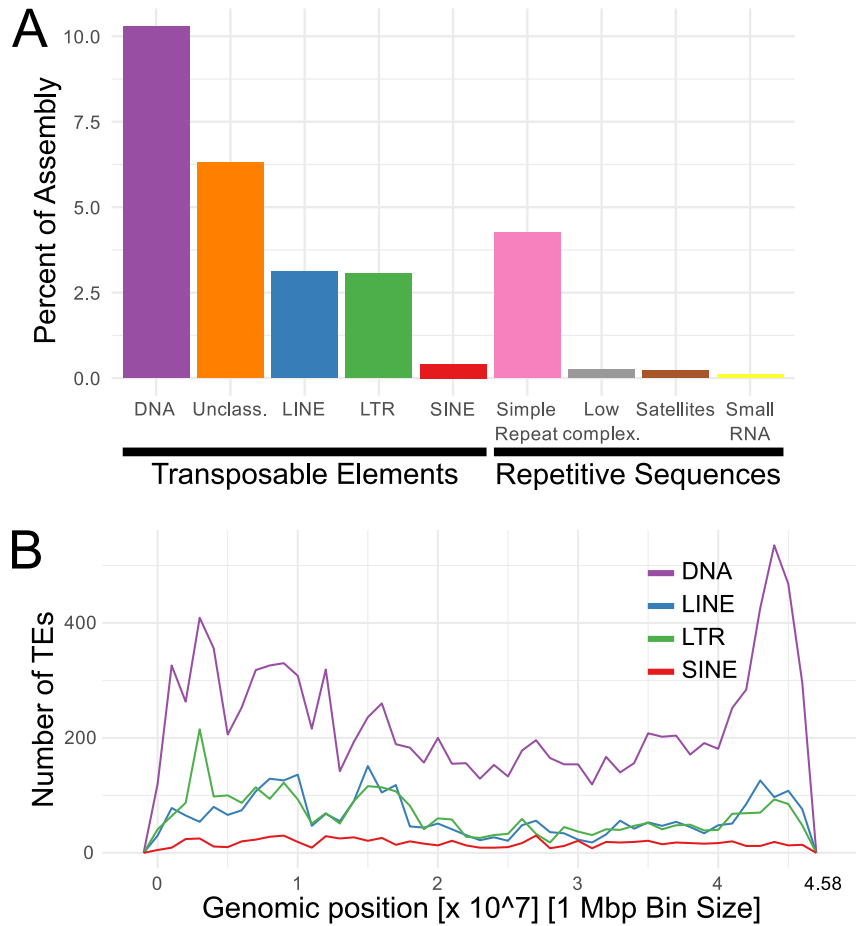

883  
884  
885  
886  
887  
888  
889  
890  
891  
892  
893  
894

**Fig. 3** Repeat content of the orange clownfish genome assembly. **(A)** Repeat content of the whole genome as classified into transposable elements and repetitive sequences. **(B)** Spatial distribution of the four main identified classes of transposable elements on chromosome 1. Transposable element spatial distribution for chromosomes 2-24 is shown in Fig S2. Detailed transposable element content is shown in Table S4.

895

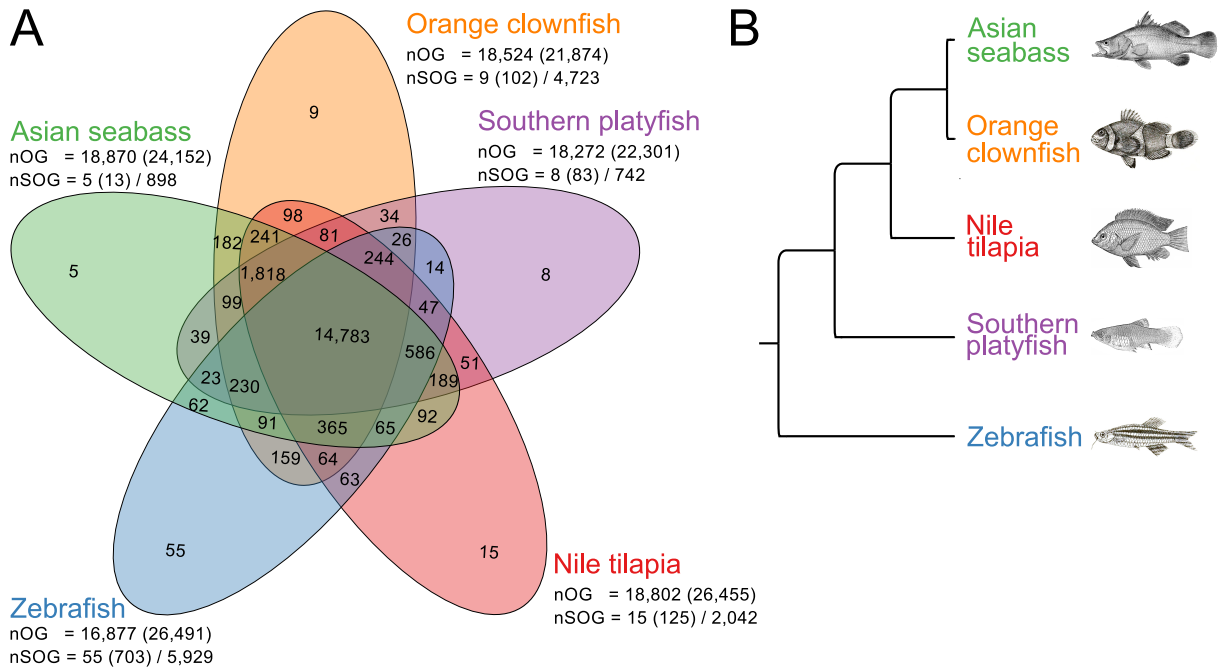

896

897 **Fig. 4 (A)** The overlap of orthologous gene families of the orange clownfish, southern  
 898 platyfish, Nile tilapia, zebrafish and Asian seabass. The total number of orthogroups (nOG)  
 899 followed by the number of genes assigned to these groups is provided below the species  
 900 name. The number of species-specific orthogroups (nSOG) and the respective number of  
 901 genes is also indicated, followed by the number of genes not assigned to any orthogroups. **(B)**  
 902 The inferred phylogenetic tree based on the ortholog groups that contain a single gene from  
 903 each species.

904

905

906

907

908

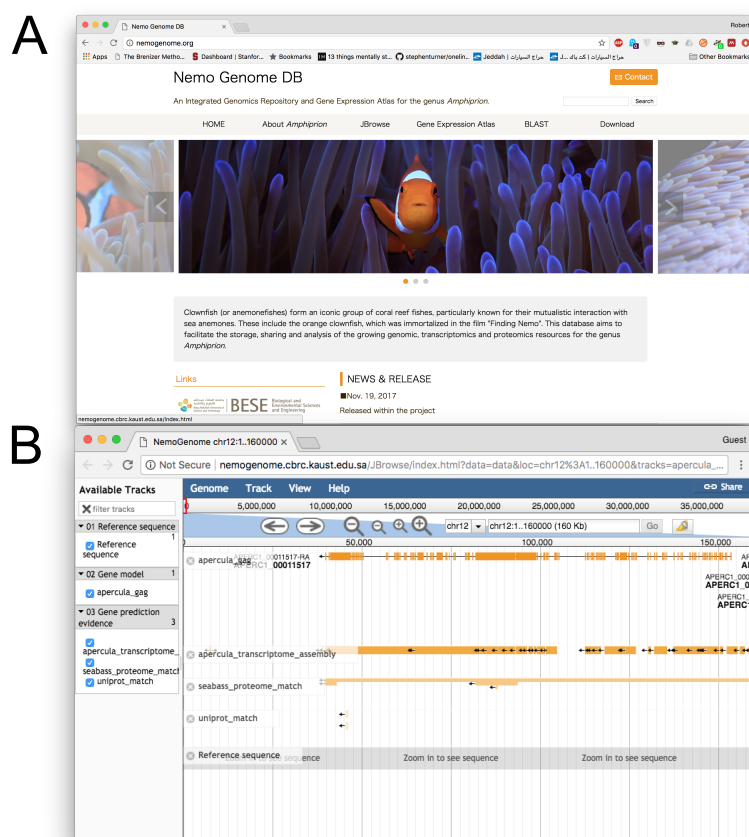

909

910 **Fig. 5 (A)** Front page of the Nemo Genome DB database, which is a portal to access the data

911 described in this manuscript and is accessible at [www.nemogenome.org](http://www.nemogenome.org). **(B)** Genome viewer

912 representation of the Titin gene.

913

914

915



916 **Table 1** Contig statistics for the preliminary candidate-assemblies

| Assembly | Length (Mb) | Number | N50 (Mb) | L50 | Longest (Mb) | Missing genes (number (%)) |
|----------|-------------|--------|----------|-----|--------------|----------------------------|
| A1       | 950.4       | 4,874  | 1.024    | 254 | 9.59         | 148 (3.23)                 |
| A2       | 945.4       | 4,374  | 1.040    | 251 | 6.67         | 156 (3.30)                 |
| A3       | 926.5       | 3,629  | 1.070    | 236 | 7.21         | 140 (3.05)                 |
| A4       | 921.8       | 2,829  | 1.380    | 184 | 8.16         | 134 (2.92)                 |
| A5       | 883.9       | 1,017  | 1.469    | 167 | 10.24        | 146 (3.18)                 |
| A6       | 902.2       | 2,204  | 1.401    | 174 | 12.38        | 134 (2.92)                 |
| A7       | 920.7       | 2,473  | 1.801    | 138 | 15.84        | 132 (2.88)                 |
| A8       | 924.6       | 2,629  | 1.742    | 143 | 16.51        | 139 (3.03)                 |
| A9       | 924.9       | 2,638  | 1.742    | 143 | 16.51        | 140 (3.05)                 |
| A10      | 917.1       | 2,368  | 1.648    | 140 | 10.21        | 146 (3.18)                 |
| A11      | 899.9       | 2,049  | 1.571    | 160 | 9.07         | 151 (3.29)                 |
| A12      | 908.8       | 2,086  | 1.602    | 142 | 10.21        | 143 (3.12)                 |

917  
918  
919  
920  
921  
922  
923  
924

925 **Table 2** Assembly statistics of the orange clownfish genome assemblies  
 926

|                                   | A7    | A7-phased | A7-phased<br>-polished | A7-PGA  | Nemo v1 |
|-----------------------------------|-------|-----------|------------------------|---------|---------|
| <b>Technology</b>                 |       |           |                        |         |         |
| Falcon                            | ✓     | -         | -                      | -       | -       |
| Falcon Unzip                      | -     | ✓         | ✓                      | ✓       | ✓       |
| PacBio                            | ✓     | ✓         | ✓                      | ✓       | ✓       |
| Quiver                            | -     | -         | ✓                      | ✓       | ✓       |
| Hi-C maps                         | -     | -         | -                      | ✓       | ✓       |
| PBJelly                           | -     | -         | -                      | -       | ✓       |
| <b>Contigs</b>                    |       |           |                        |         |         |
| Length (Mb)                       | 920.7 | 905.0     | 903.6                  | 903.6   | 908.9   |
| Number                            | 2,473 | 1,505     | 1,414                  | 1,414   | 1,045   |
| N50 length (Mb)                   | 1.80  | 1.85      | 1.86                   | 1.86    | 3.12    |
| L50 count                         | 138   | 135       | 134                    | 134     | 84      |
| Longest (Mb)                      | 15.84 | 15.83     | 15.85                  | 15.9    | 16.6    |
| No. Scaffolded                    | -     | -         | -                      | 1,073   | 704     |
| <b>Scaffolds</b>                  |       |           |                        |         |         |
| Length (Mb)                       | -     | -         | -                      | 903.7   | 908.9   |
| Number                            | -     | -         | -                      | 365     | 365     |
| N50 length (Mb)                   | -     | -         | -                      | 38.1    | 38.4    |
| L50 count                         | -     | -         | -                      | 12      | 12      |
| Longest (Mb)                      | -     | -         | -                      | 45.8    | 46.1    |
| Ns                                | -     | -         | -                      | 104,900 | 32,395  |
| Number of gaps                    | -     | -         | -                      | 1,049   | 680     |
| <b>Chromosomes</b>                |       |           |                        |         |         |
| Length in chr (Mb)                | -     | -         | -                      | 885.4   | 890.2   |
| % assembly in chr                 | -     | -         | -                      | 98.0%   | 97.9%   |
| % assembly not in chr             | -     | -         | -                      | 2.0%    | 2.1%    |
| % of predicted genome size in chr | -     | -         | -                      | 94.3%   | 94.8%   |

927  
 928 \* Predicted genome size is 938.88 Mb (Hardie & Hebert, 2004).

929

930 **Table 3** Chromosome metrics before and after polishing of the final assembly

931

| Chromosome  | A7-PGA assembly |       | Nemo v1 assembly |       |              |            |
|-------------|-----------------|-------|------------------|-------|--------------|------------|
|             | Length          |       | Length           |       | Gene density |            |
|             | Contigs         | (Mb)  | Contigs          | (Mb)  | Genes        | (genes/Mb) |
| 1           | 57              | 45.8  | 31               | 46.1  | 1,091        | 23.8       |
| 2           | 41              | 43.3  | 31               | 43.4  | 1,132        | 26.1       |
| 3           | 55              | 43.2  | 28               | 43.4  | 1,395        | 32.3       |
| 4           | 47              | 42.0  | 29               | 42.2  | 1,259        | 30.0       |
| 5           | 32              | 40.5  | 31               | 40.6  | 1,303        | 32.2       |
| 6           | 44              | 40.4  | 24               | 40.6  | 1,337        | 33.1       |
| 7           | 37              | 40.2  | 32               | 40.4  | 1,324        | 32.9       |
| 8           | 42              | 39.3  | 26               | 39.4  | 1,276        | 32.5       |
| 9           | 47              | 39.0  | 25               | 39.2  | 1,083        | 27.8       |
| 10          | 55              | 38.3  | 38               | 38.6  | 1,339        | 35.0       |
| 11          | 40              | 38.3  | 23               | 38.5  | 1,037        | 27.1       |
| 12          | 48              | 38.1  | 23               | 38.4  | 1,067        | 28.0       |
| 13          | 30              | 37.6  | 20               | 37.7  | 1,014        | 27.0       |
| 14          | 33              | 37.3  | 33               | 37.4  | 1,362        | 36.5       |
| 15          | 45              | 37.3  | 22               | 37.4  | 1,091        | 29.2       |
| 16          | 77              | 36.3  | 50               | 36.6  | 1,018        | 28.0       |
| 17          | 35              | 35.2  | 23               | 35.4  | 987          | 28.0       |
| 18          | 40              | 34.9  | 32               | 35.1  | 1,126        | 32.3       |
| 19          | 53              | 34.0  | 35               | 34.2  | 1,062        | 31.2       |
| 20          | 46              | 33.4  | 31               | 33.7  | 1,132        | 33.9       |
| 21          | 40              | 30.7  | 21               | 30.8  | 725          | 23.6       |
| 22          | 29              | 29.6  | 20               | 29.8  | 786          | 26.6       |
| 23          | 32              | 27.2  | 23               | 27.4  | 904          | 33.2       |
| 24          | 68              | 23.4  | 53               | 23.7  | 723          | 30.9       |
| In chr:     | 1,073           | 885.4 | 704              | 890.2 | 26,309       | Ave: 29.7  |
| Not in chr: | 341             | 18.4  | 341              | 18.8  | 288          | 15.3       |
| Total:      | 1,414           | 903.7 | 1,045            | 908.8 | 26,597       | Ave: 29.3  |

932

933 **Table 4** Gene annotation statistics

|                              | Initial<br>BRAKER1 | Final<br>MAKER2 |
|------------------------------|--------------------|-----------------|
| Genes                        | 49,881             | 26,597          |
| mRNAs                        | 55,273             | 35,478          |
| Exons                        | 391,637            | 463,688         |
| Introns                      | 336,364            | 428,210         |
| CDSs                         | 55,273             | 35,478          |
| Overlapping genes            | 2,407              | 1,852           |
| Contained genes              | 744                | 463             |
| Longest gene                 | 264,684            | 264,684         |
| Longest mRNA                 | 264,684            | 264,684         |
| Mean gene length             | 8,097              | 13,049          |
| Mean mRNA length             | 9,841              | 17,727          |
| % of genome covered by genes | 44.4               | 38.2            |
| % of genome covered by CDS   | 7.5                | 8.1             |
| Exons per mRNA               | 7                  | 13              |
| Introns per mRNA             | 6                  | 12              |
| <b>BUSCO</b>                 |                    |                 |
| Completeness                 | 95.94%             | 96.25%          |
| Complete                     | 4,398              | 4,412           |
| Single-Copy                  | 3,588              | 3,888           |
| Duplicated                   | 810                | 524             |
| Fragmented                   | 138                | 96              |
| Missing                      | 48                 | 76              |
| Total                        | 4,584              | 4,584           |

934

935

936

937
